# Supplementary material
Source: PubMed Central journal article supplement (PMC7497634)
Supplement: bm9b01596_si_001.pdf [file bm9b01596_si_001.pdf]

# SUPPORTING INFORMATION

## Glucose and maltose surface functionalized thermoresponsive poly(N-vinylcaprolactam) nanogels

*Joonas Siirilä, Sami Hietala, Filip S. Ekholm, Heikki Tenhu*

Department of Chemistry, University of Helsinki, FINLAND

### Table of content

|                                                                                      |    |
|--------------------------------------------------------------------------------------|----|
| NMR-spectra of Glc-N <sub>3</sub> .....                                              | 2  |
| NMR-spectra of Glc-TEG-N <sub>3</sub> .....                                          | 3  |
| NMR-spectra of Mal-N <sub>3</sub> .....                                              | 4  |
| NMR-spectra of Glc-TEG-N <sub>3</sub> .....                                          | 5  |
| Kinetics of PNVCL nanogel synthesis .....                                            | 6  |
| <sup>1</sup> H-NMR spectrum of PA .....                                              | 7  |
| <sup>1</sup> H-NMR spectrum of PNVCL nanogel .....                                   | 8  |
| <sup>1</sup> H-NMR spectrum of PNVCL-TEG-Glc .....                                   | 9  |
| <sup>1</sup> H-NMR spectrum of PNVCL-Mal.....                                        | 10 |
| <sup>1</sup> H-NMR spectrum of PNVCL-TEG-Mal .....                                   | 11 |
| Kinetics of a sugar functionalization of PNVCL-PA nanogel.....                       | 12 |
| <sup>1</sup> H-NMR spectrum of PNVCL-Glc prepared via CuAAC in D <sub>2</sub> O..... | 13 |
| Size distributions (CONTIN) of PNVCL-sugars at 25 °C.....                            | 14 |

Hydrodynamic size of PNVCL-sugars as a function of temperature .....14  
Salt induced aggregation at 50 °C.....15

### NMR-spectra of Glc-N<sub>3</sub>

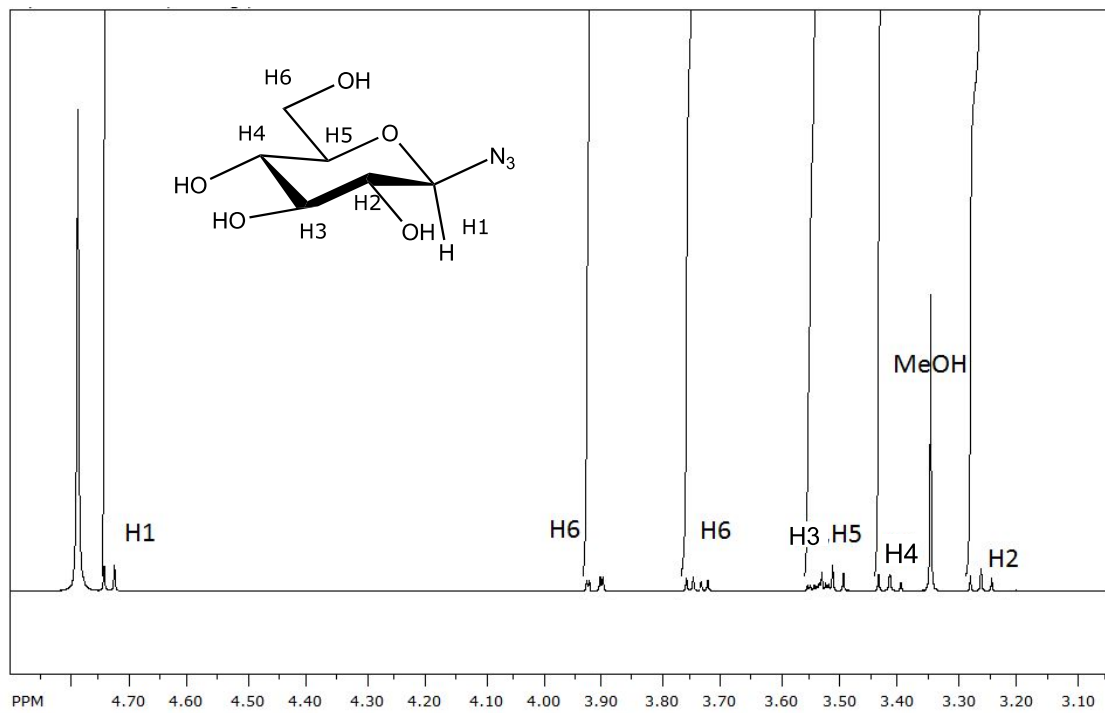

Figure S1. <sup>1</sup>H-NMR spectrum of Glc-N<sub>3</sub>

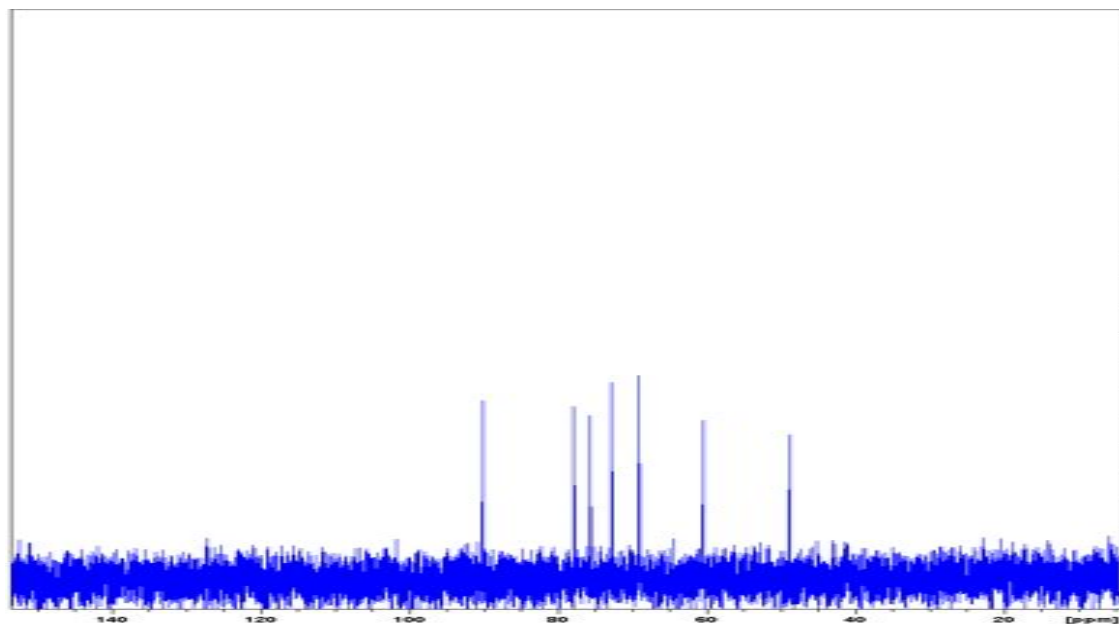

Figure S2. <sup>13</sup>C-NMR spectrum of Glc-N<sub>3</sub>

### NMR-spectra of Glc-TEG-N<sub>3</sub>

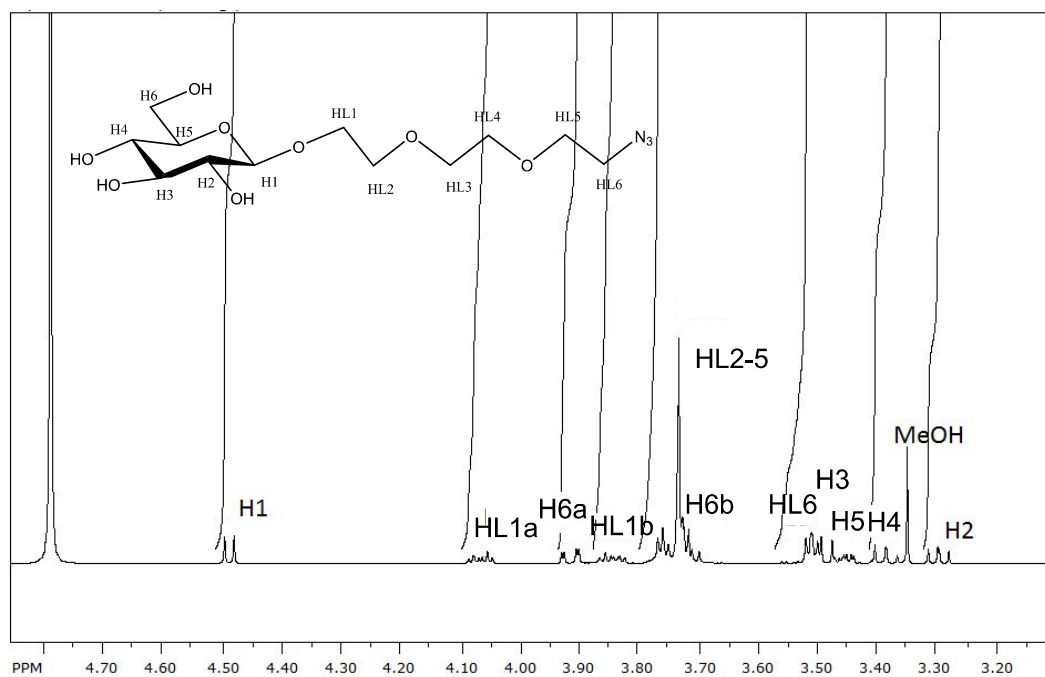

Figure S3. <sup>1</sup>H-NMR spectrum of Glc-TEG-N<sub>3</sub>.

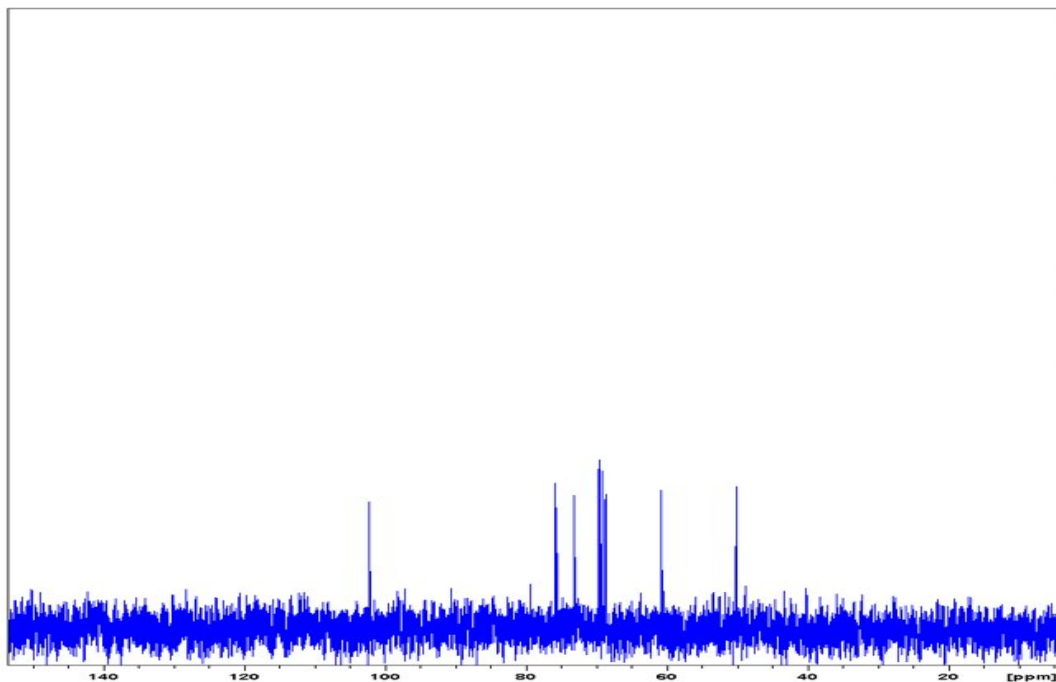

Figure S4.  $^{13}\text{C}$ -NMR spectrum of Glc-TEG- $\text{N}_3$ .

### NMR-spectra of Mal- $\text{N}_3$

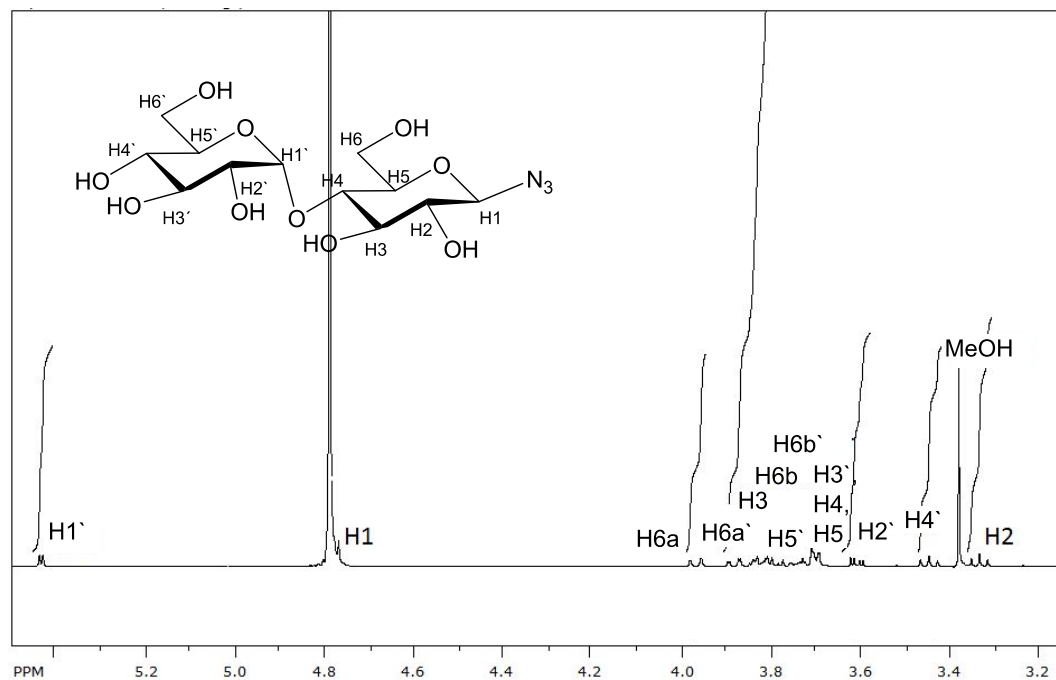

Figure S5.  $^1\text{H}$ -NMR spectrum of Glc-TEG- $\text{N}_3$ .

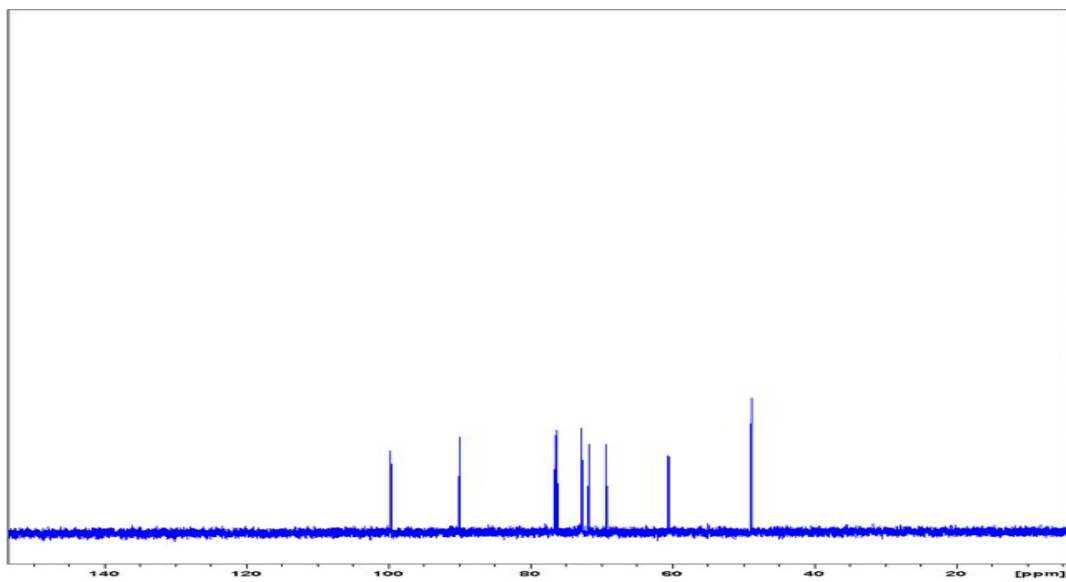

Figure S6.  $^{13}\text{C}$ -NMR spectrum of Glc-TEG- $\text{N}_3$ .

### NMR-spectra of Glc-TEG- $\text{N}_3$

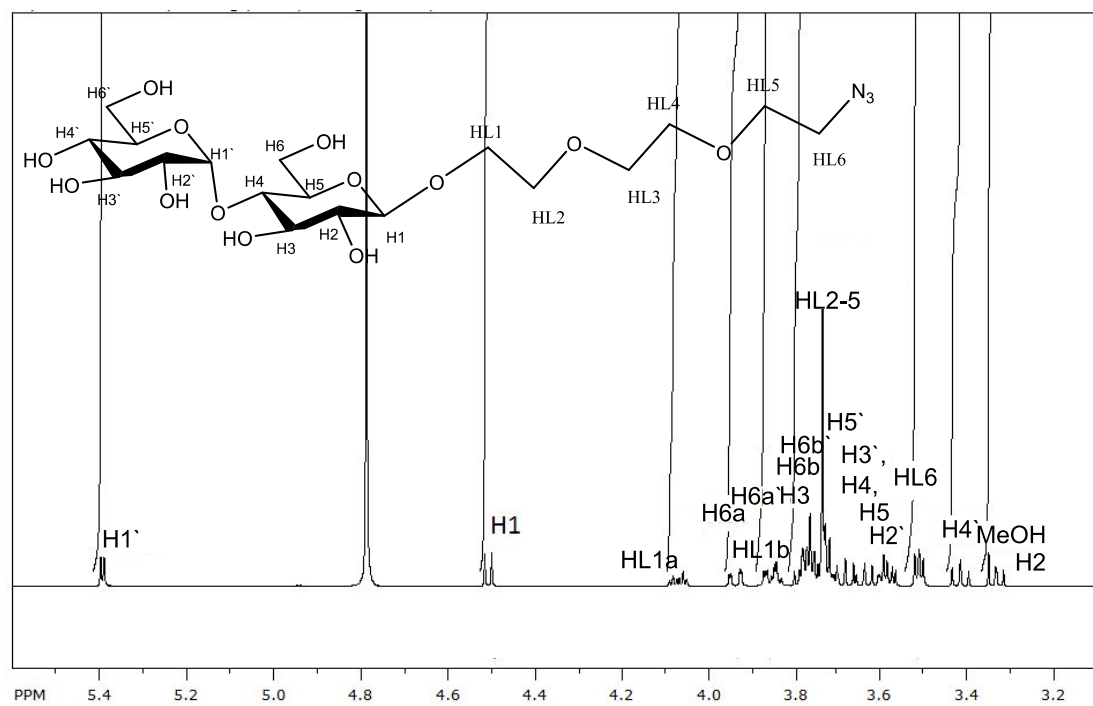

Figure S7.  $^1\text{H}$ -NMR spectrum of Glc-TEG- $\text{N}_3$ .

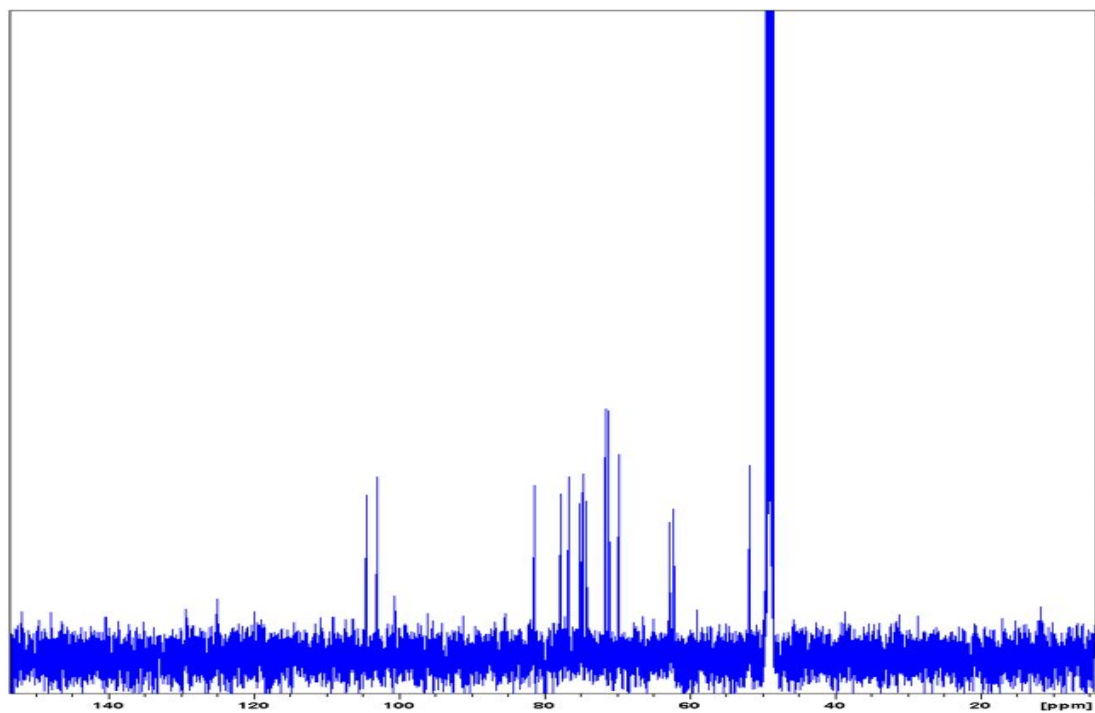

Figure S8.  $^{13}\text{C}$ -NMR spectrum of Glc-TEG- $\text{N}_3$ .

### Kinetics of PNVCL nanogel synthesis

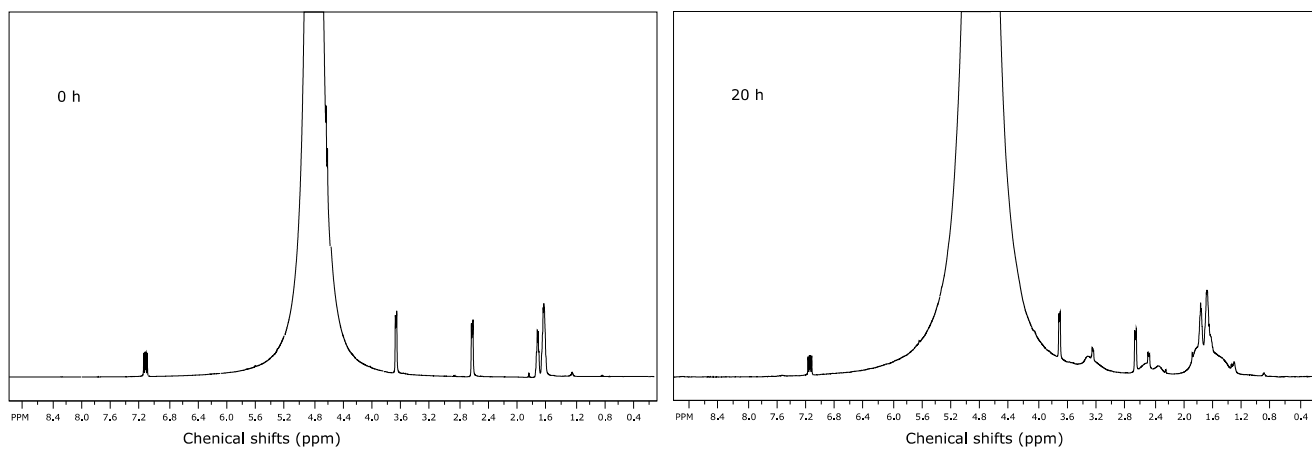

Figure S9.  $^1\text{H}$ -NMR spectrum of conversion sample taken after 0h (left) and after 20h (right)

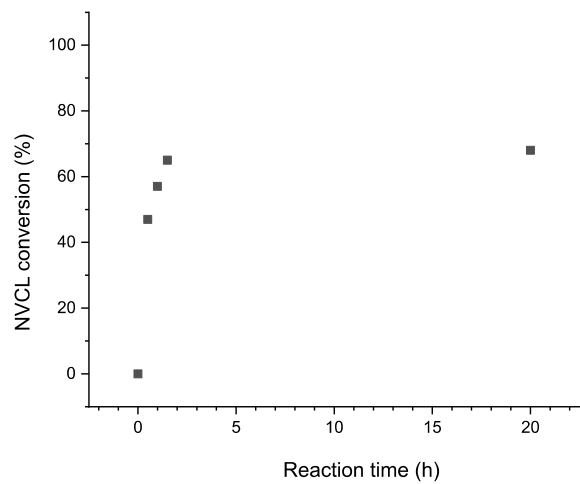

Figure S10. Kinetics of the polymerization according to  $^1\text{H-NMR}$

# $^1\text{H-NMR}$ spectrum of PA

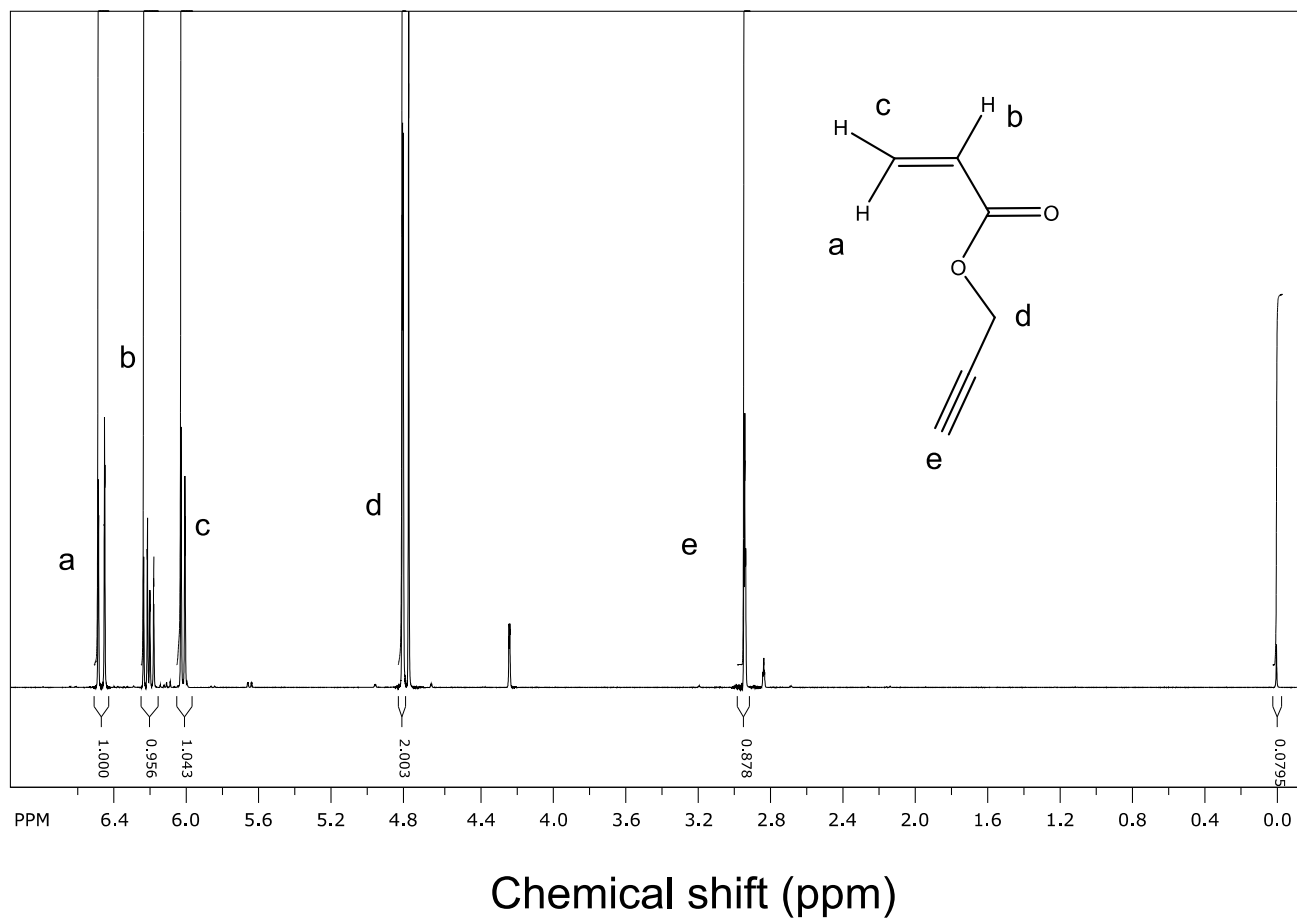

Figure S11.  $^1\text{H-NMR}$  spectrum of PA in  $\text{D}_2\text{O}$



# $^1\text{H-NMR}$ spectrum of PNVCL nanogel

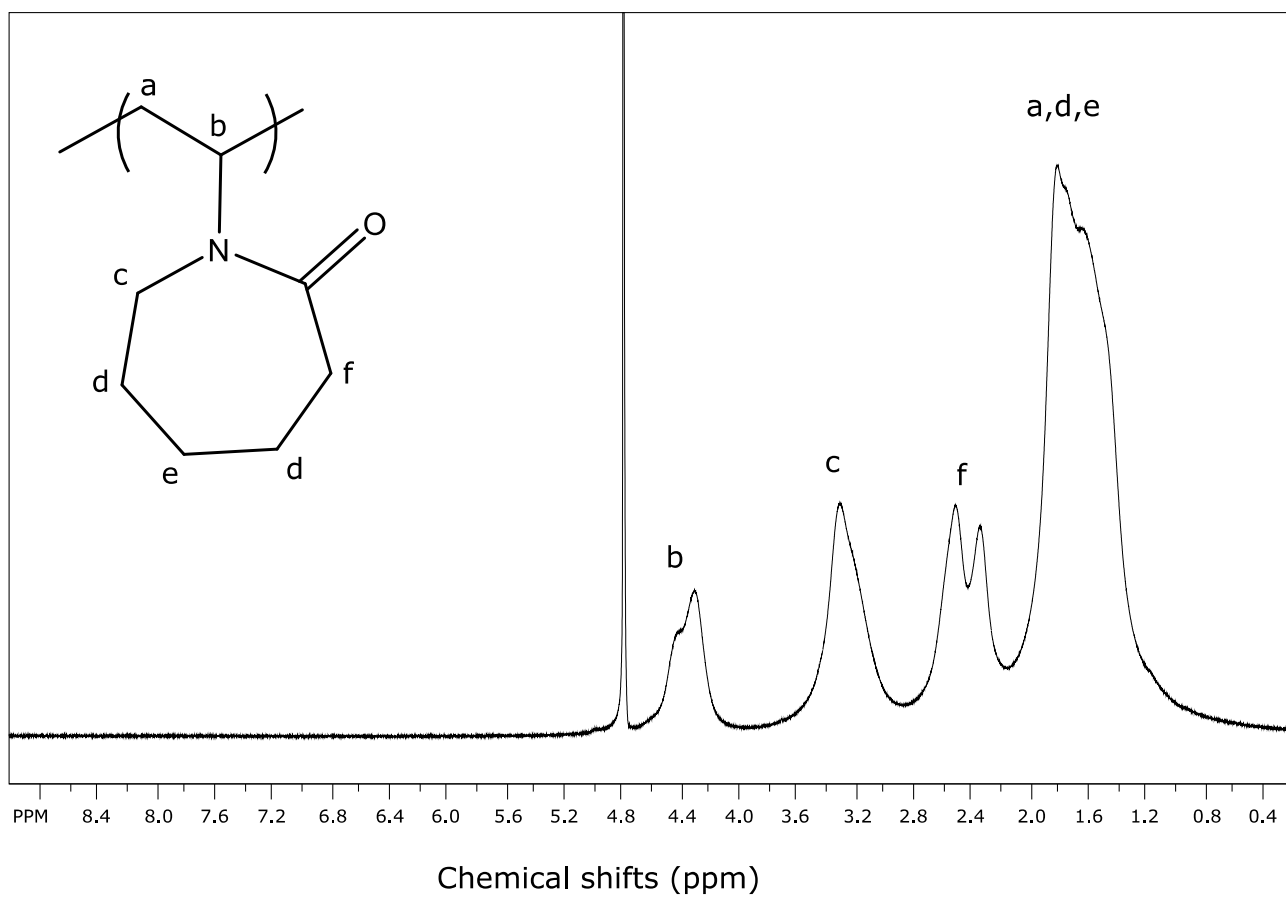

Figure S12.  $^1\text{H-NMR}$  spectrum of PNVCL nanogel

# <sup>1</sup>H-NMR spectrum of PNVCL-TEG-Glc

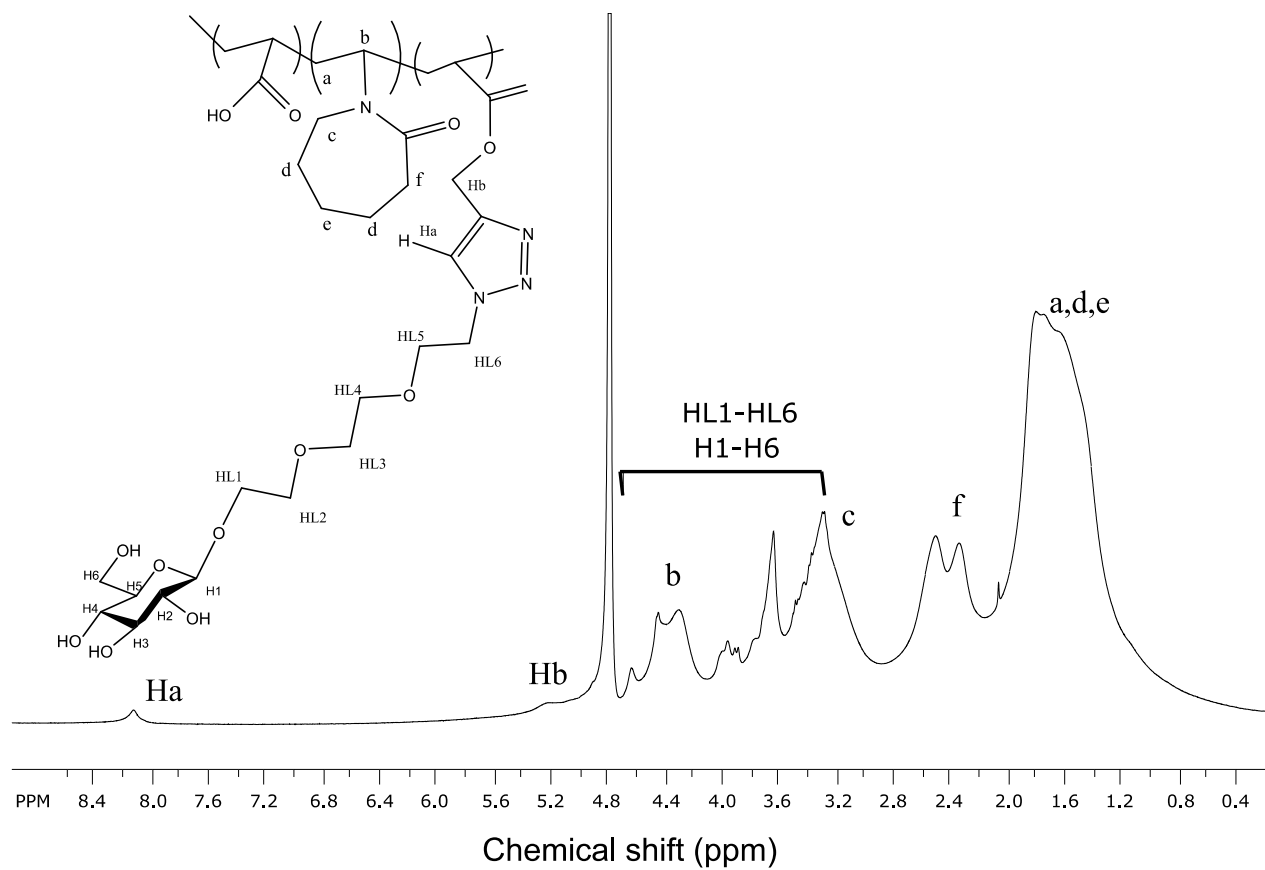

Figure S13. <sup>1</sup>H-NMR spectrum of PNVCL-TEG-Glc

# $^1\text{H-NMR}$ spectrum of PNVCL-Mal

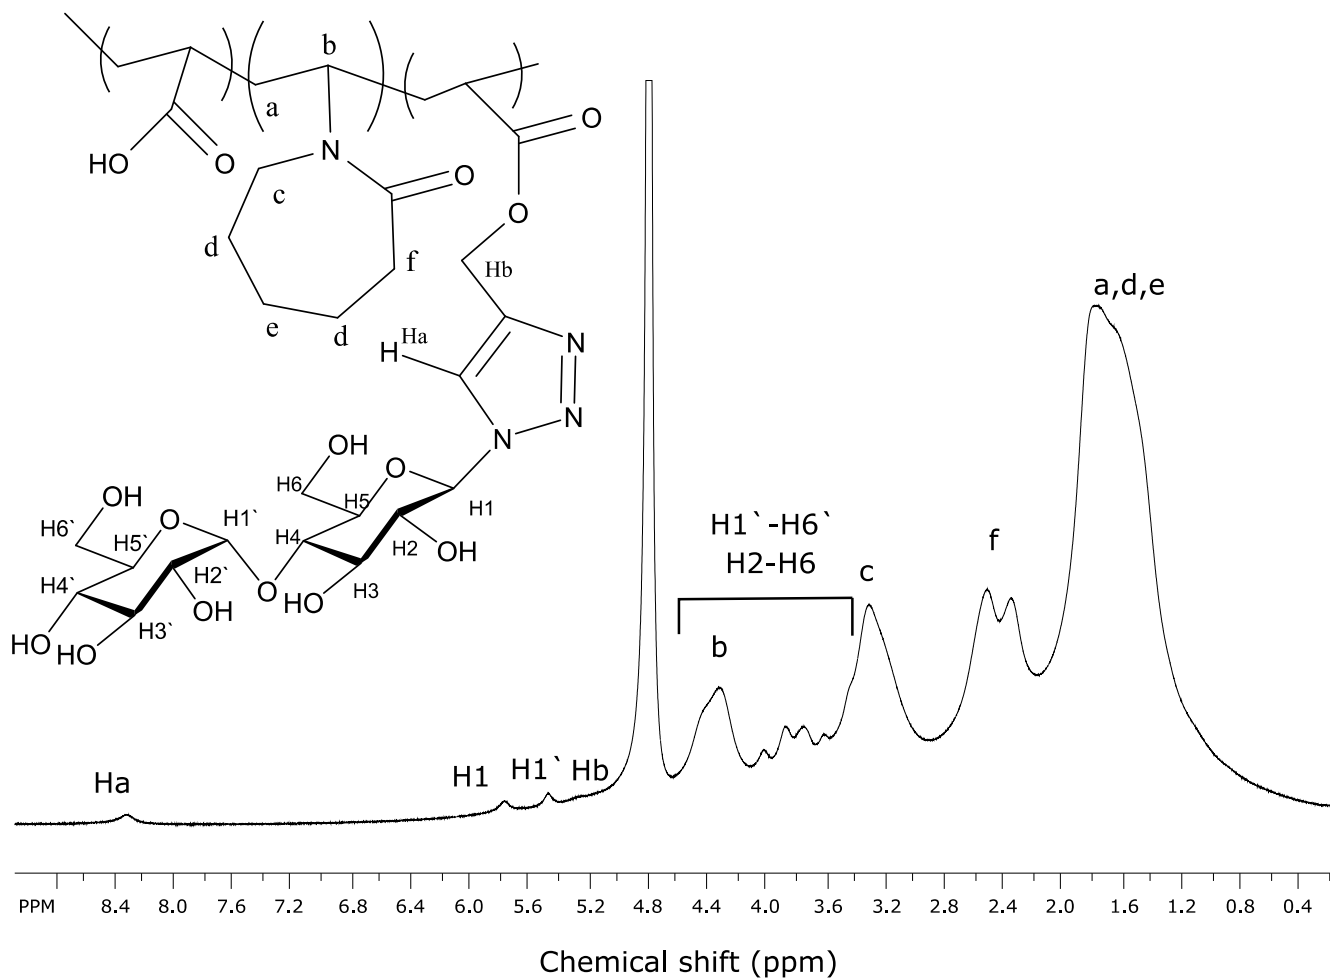

Figure S14.  $^1\text{H-NMR}$  spectrum of PNVCL-Mal

# $^1\text{H-NMR}$ spectrum of PNVCL-TEG-Mal

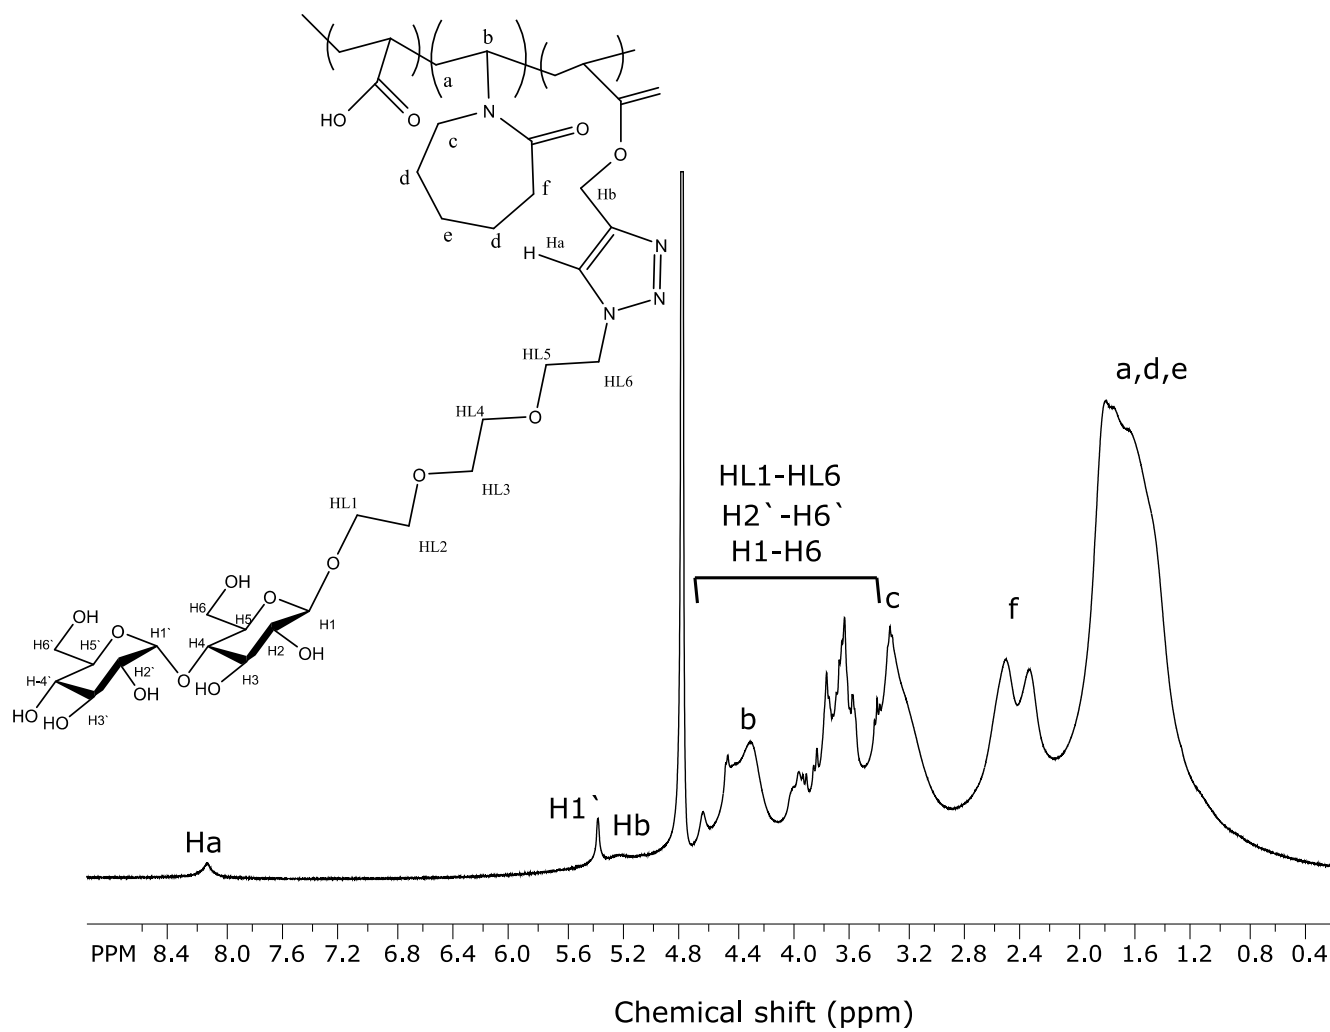

Figure S15.  $^1\text{H-NMR}$  spectrum of PNVCL-TEG-Mal

## Kinetics of a sugar functionalization of PNVCL-PA nanogel

To make sure that the reaction time was long enough, a replica of the conjugation reaction to obtain PNVLC-Glc was performed in  $D_2O$  and followed with  $^1H$ -NMR. The intensity of a peak at 5.8 ppm, was used to follow the reaction ( $^1H$ -spectrum of PNVCL-Glc with peak assignments is presented in main article Figure 6) and results are presented in Figure S12. It is seen that the reaction has happened during 8 h.  $^1H$ -NR of the purified product is presented in Figure S13. The nanogel synthesized in  $D_2O$  differs from the PNVCL-Glc nanogel, as there is a deuterium ion instead of a proton attached to the triazole ring. Akula et al. have studied this phenomenon of CuAAC reactions in  $D_2O$  as “a efficient route for the synthesis of deuterated 1,2,3-triazoles”.<sup>S1</sup>

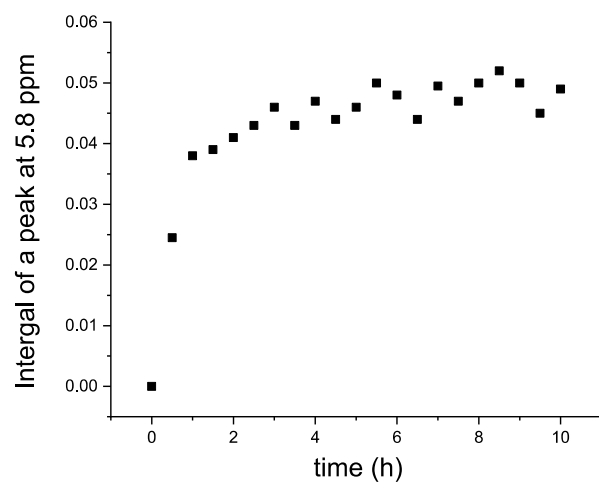

Figure S16. Kinetic of reaction between Glc-N<sub>3</sub> and PNVL-PA nanogel based on a <sup>1</sup>H-NMR-experiment

S1. Akula HK, Lakshman MK. Synthesis of deuterated 1,2,3-triazoles. *The Journal of organic chemistry*. 2012;77(20):8896

<sup>1</sup>H-NMR spectrum of PNVCL-Glc prepared via CuAAC in D<sub>2</sub>O

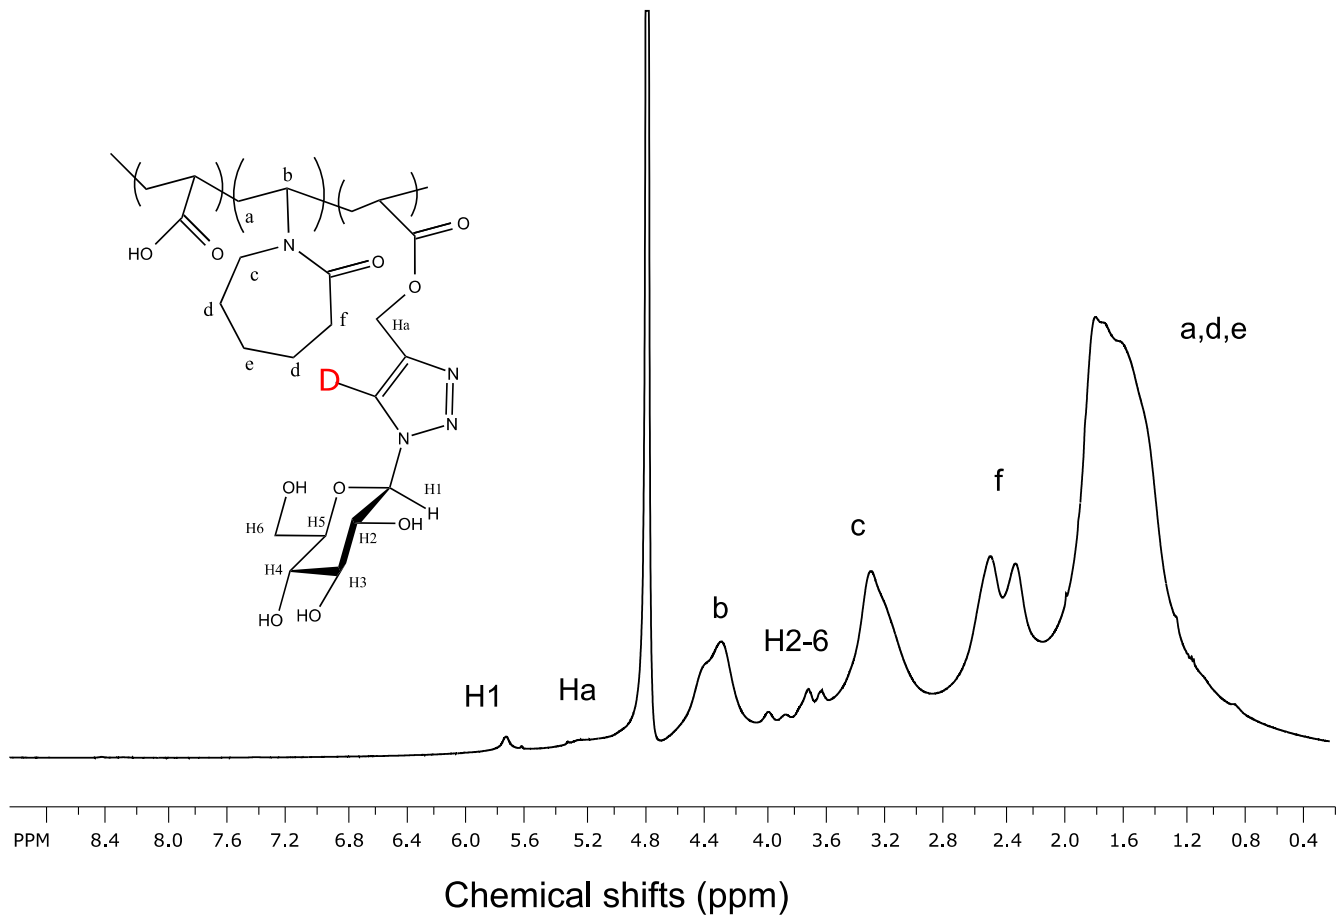

Figure S17. <sup>1</sup>H-NMR spectrum of PNVC-L-Glc prepare via CuAAC in D<sub>2</sub>O

Size distributions (CONTIN) of PNVC-L-sugars at 25 °C

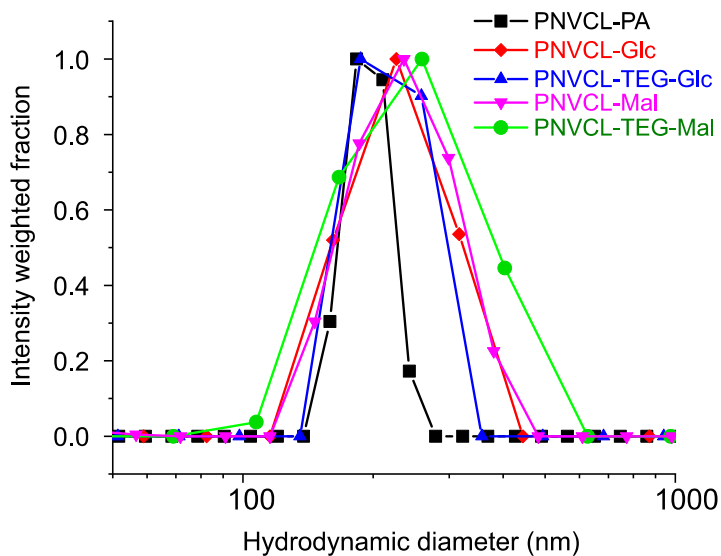

Figure S18. Hydrodynamic size distributions (CONTIN) of selected nanogels; 0.25 mg/ml in 10 mM HEPES (pH=7.4) at 25 °C

### Hydrodynamic size of PNVCL-sugars as a function of temperature

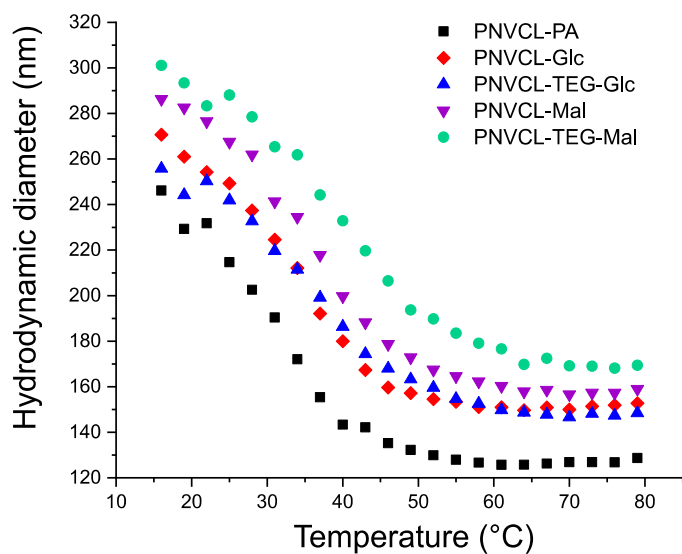

Figure S19. Hydrodynamic mean size of selected nanogels as functions of temperature; 0.25 mg/ml in 10 mM HEPES (pH=7.4) at 25 °C



## Salt induced aggregation at 50 °C

Selected salt induced aggregation tests are shown Figure S16. Two points were obtained from each curve  $C_1$  and  $C_2$ . Aggregation concentration,  $C_1$ , was taken from the point where transmittance as a function of NaCl concentration broke the linear trend. Precipitation concentration ( $C_2$ ) was determined a point, where the transmittance had increased compared to previous concentration. The increase of transmittance was due to visible aggregates sedimenting out of the solution in the given 15 min stabilization time. Both aggregation ( $C_1$ ) and precipitation ( $C_2$ ) concentrations are listed in table S1. In addition, size distribution of PNVC-L-PA in selected NaCl concentrations was measured with light scattering, see Figure S17. There was no change in particle size before and only a moderate change above the  $C_1$  concentration. This evidenced the gradual process of particle aggregation. First nanogels start to associate moderately at  $C_1$  and then upon further increasing the NaCl the aggregates become larger and finally the aggregates become too large to stay in solution and precipitate out of solution.

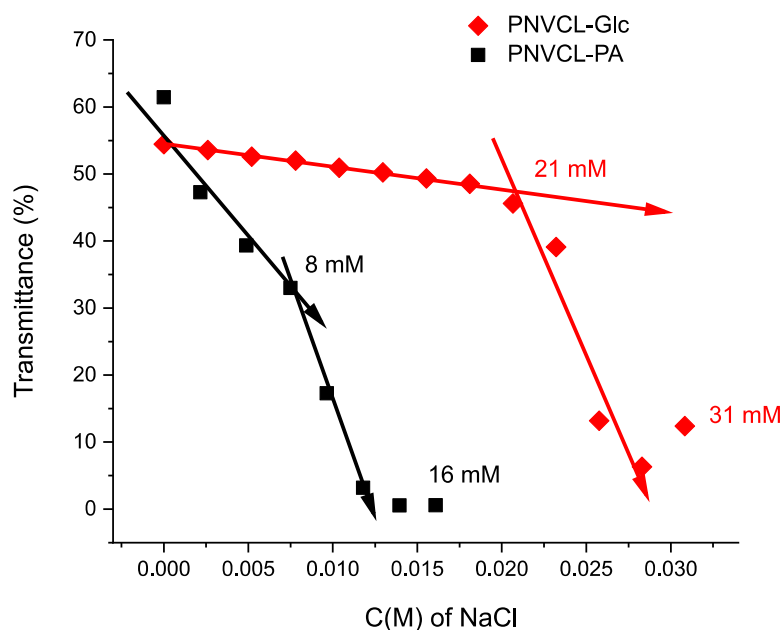

Figure S20. Salt induced aggregation of PNVC-L-Glc and PNVC-L-PA at 50 °C

Table. S1 Aggregation and precipitation concentrations of NaCl, see Figure S16

| Product          | $C_1$ (mM) of NaCl | $C_2$ (mM) of NaCl |
|------------------|--------------------|--------------------|
| PNVCL-PA nanogel | 8                  | 16                 |
| PNVCL-Glc        | 21                 | 31                 |
| PNVCL-TEG-Glc    | 21                 | 34                 |
| PNVCL-Mal        | 20                 | 29                 |
| PNVCL-TEG-Mal    | 21                 | 31                 |

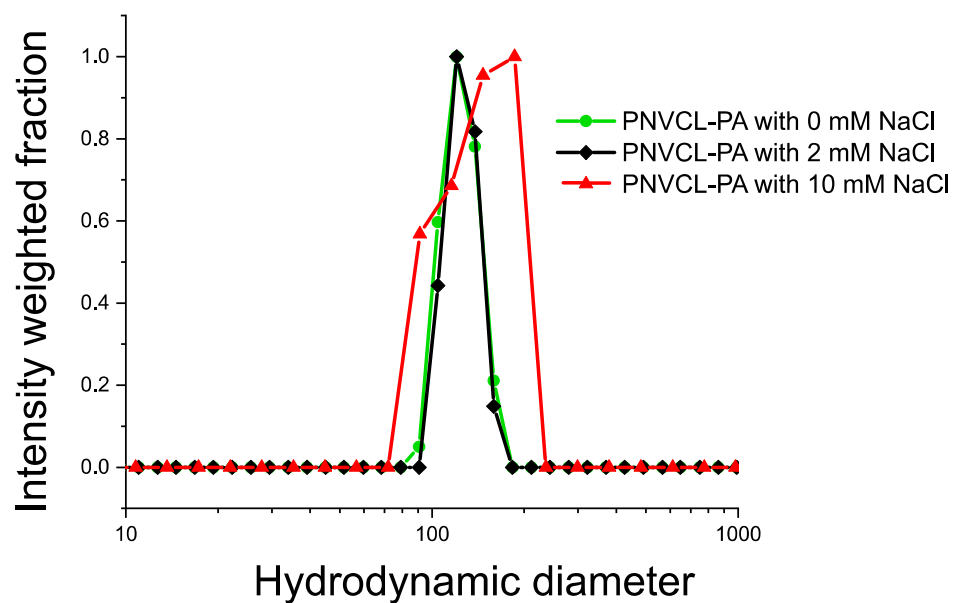

Figure S21. Size distribution of PNVCL-PA at various NaCl concentrations at 50 °C
